# Supplementary material
Source: PubMed Central journal article supplement (PMC5581715)
Supplement: NIHMS885876-supplement.pdf [file NIHMS885876-supplement.pdf]

## Supplementary Material

# Chemical Modulators for Epigenome Reader Domains as Emerging Epigenetic Therapies for Cancer and Inflammation

Nilesh Zaware<sup>a</sup>, and Ming-Ming Zhou<sup>a,\*</sup>

*<sup>a</sup>Department of Pharmacological Sciences, Icahn School of Medicine at Mt. Sinai, 1425 Madison Avenue, New York, NY 10029, United States*

\* Corresponding author: Zhou, Ming-Ming (Ming-Ming.Zhou@mssm.edu)

**Table of contents**

---

|   |                                     |    |
|---|-------------------------------------|----|
| 1 | Supplementary Table 1 (Part 1 of 2) | S3 |
| 2 | Supplementary Table 1 (Part 2 of 2) | S4 |
| 3 | Supplementary Figure 1              | S5 |
| 4 | Supplementary Figure 2              | S6 |

---

**Supplementary Table 1 (Part 1 of 2).<sup>a</sup> Bromodomain Inhibitors in Human Clinical trials**

| Compound                                                                                                    | Sponsor                       | Indication                              | Phase/Status         | NCT identifier |
|-------------------------------------------------------------------------------------------------------------|-------------------------------|-----------------------------------------|----------------------|----------------|
| RVX208 (RVX00022)<br>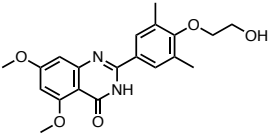      | Resverlogix Corp.             | Diabetes                                | 2/Completed          | NCT01728467    |
|                                                                                                             |                               | Diabetes, CAD                           | 2/Terminated         | NCT01863225    |
|                                                                                                             |                               | Atherosclerosis, CAD                    | 2/Completed          | NCT01058018    |
|                                                                                                             |                               | Dyslipidemia, Atherosclerosis, ACS, CVD | 1,2/Completed        | NCT00768274    |
|                                                                                                             |                               | T2DM, CAD, CVD                          | 3/Recruiting         | NCT02586155    |
|                                                                                                             |                               | CAD, Dyslipidemia                       | 2/Completed          | NCT01423188    |
|                                                                                                             |                               | CAD                                     | 2/Completed          | NCT01067820    |
| OTX015 (MK-8628)<br>       | Oncoethix GmbH                | Glioblastoma Multiforme                 | 1,2/Terminated       | NCT02296476    |
|                                                                                                             |                               | AML, DLBCL, ALL, MM                     | 1/Completed          | NCT01713582    |
|                                                                                                             |                               | NMC, TNBC, NSCLC, CRPC, PDAC            | 1/Completed          | NCT02259114    |
|                                                                                                             |                               | NMC, TNBC, NSCLC, CRPC                  | 1/Ongoing            | NCT02698176    |
|                                                                                                             |                               | AML                                     | 1/Ongoing            | NCT02698189    |
| CPI-0610<br>              | University of Texas SMC       | PNT                                     | 2/Not yet recruiting | NCT02986919    |
|                                                                                                             | Constellation Pharmaceuticals | Lymphoma                                | 1/Not yet recruiting | NCT01949883    |
|                                                                                                             |                               | MM                                      | 1/Recruiting         | NCT02157636    |
|                                                                                                             |                               | AMcL, MDS, MDS/MPN U, myelofibrosis     | 1/Recruiting         | NCT02158858    |
| I-BET762 (GSK525762)<br> | GlaxoSmithKline               | RRHMs                                   | 1/Recruiting         | NCT01943851    |
|                                                                                                             |                               | ER+ breast cancer                       | 2/Recruiting         | NCT02964507    |
|                                                                                                             |                               | NMC and other cancers                   | 1/Recruiting         | NCT01587703    |
|                                                                                                             |                               | Drug Interactions                       | 1/Completed          | NCT02706535    |

<sup>a</sup> Data from www.clinicaltrials.com on April 7, 2017. Abbreviations: ACS, acute coronary syndrome; ALL, acute lymphoblastic leukemia; AML, acute myeloid leukemia; AMcL, acute myelocytic leukemia; CAD, coronary artery disease; CRPC, castration-resistant prostate cancer; CVD, cardiovascular disease; DLBCL, diffuse large B-cell lymphoma; ER+ breast cancer, estrogen receptor-positive breast cancer; MDS, myelodysplastic syndrome; MDS/MPN U, myelodysplastic/myeloproliferative neoplasm, unclassifiable; MM, multiple myeloma; NMC, NUT midline carcinoma; NSCLC, non-small cell lung cancer; PDAC, pancreatic ductal adenocarcinoma; PNT, peripheral nerve tumor; RRHMs, relapsed refractory hematologic malignancies; SMC, Southwestern Medical Center; T2DM, type 2 diabetes mellitus; TNBC, triple negative breast cancer.

<sup>b</sup> Structure not disclosed.

Supplementary Table 1 (Part 2 of 2).<sup>a</sup> Bromodomain Inhibitors in Human Clinical trials

| Compound                                                                            | Sponsor                       | Indication                     | Phase/Status   | NCT identifier |
|-------------------------------------------------------------------------------------|-------------------------------|--------------------------------|----------------|----------------|
| ZEN003694 <sup>b</sup>                                                              | Zenith Epigenetics            | Metastatic CRPC                | 1/Recruiting   | NCT02711956    |
| TEN-010 (RO6870810)                                                                 | Hoffmann-La Roche             | MDS, AML                       | 1/Recruiting   | NCT02308761    |
| 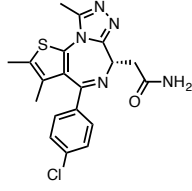   |                               | Solid tumors, AST              | 1/Ongoing      | NCT01987362    |
| GS-5829 <sup>b</sup>                                                                | Gilead Sciences               | Solid tumors, Lymphomas        | 1/Recruiting   | NCT02392611    |
|                                                                                     |                               | Metastatic CRPC                | 1,2/Recruiting | NCT02607228    |
|                                                                                     |                               | AEHBC                          | 1,2/Recruiting | NCT02983604    |
| BAY 1238097 <sup>b</sup>                                                            | Bayer                         | Neoplasms                      | 1/Terminated   | NCT02369029    |
| INCB054329 <sup>b</sup>                                                             | Incyte Corporation            | Advanced Cancer                | 1,2/Recruiting | NCT02431260    |
| BMS-986158 <sup>b</sup>                                                             | Bristol-Myers Squibb          | Multiple Indications Cancer    | 1,2/Recruiting | NCT02419417    |
| FT-1101 <sup>b</sup>                                                                | Forma Therapeutics, Inc.      | AML, AMgL, MDS                 | 1/Recruiting   | NCT02543879    |
| GSK2820151 <sup>b</sup>                                                             | GlaxoSmithKline               | AST, RST                       | 1/Recruiting   | NCT02630251    |
| PLX51107 <sup>b</sup>                                                               | Plexxikon                     | Solid tumors, AML, MDS         | 1/Recruiting   | NCT02683395    |
| ABBV-075                                                                            | AbbVie                        | Advanced Cancer, Breast Cancer | 1/Recruiting   | NCT02391480    |
|   |                               | NSCLC, AML, MM, SCLC, PC, NL   |                |                |
| INCB057643 <sup>b</sup>                                                             | Incyte Corporation            | Advanced Cancer                | 1,2/Recruiting | NCT02711137    |
| N-methyl-pyrrolidone                                                                | Peter MacCallum Cancer Centre | RRMM                           | 1/Recruiting   | NCT02468687    |
|  |                               |                                |                |                |
| BI 894999 <sup>b</sup>                                                              | Boehringer Ingelheim          | Neoplasms                      | 1/Ongoing      | NCT02516553    |

<sup>a</sup>Data from www.clinicaltrials.com on April 7, 2017. Abbreviations: AEHBC, Advanced Estrogen Receptor Positive HER2-Breast Cancer; AML, acute myeloid leukemia; AMgL, Acute Myelogenous Leukemia; AST, advanced solid tumors; CRPC, castration-resistant prostate cancer; MDS, myelodysplastic syndrome; MM, multiple myeloma; NL, Non-Hodgkins Lymphoma; NMP, N-methyl-2-pyrrolidone; NSCLC, nonsmall cell lung cancer; PC, prostate cancer; RRMM, relapsed refractory multiple myeloma; RST, recurrent solid tumors; SCLC, small cell lung cancer;

<sup>b</sup>Structure not disclosed.

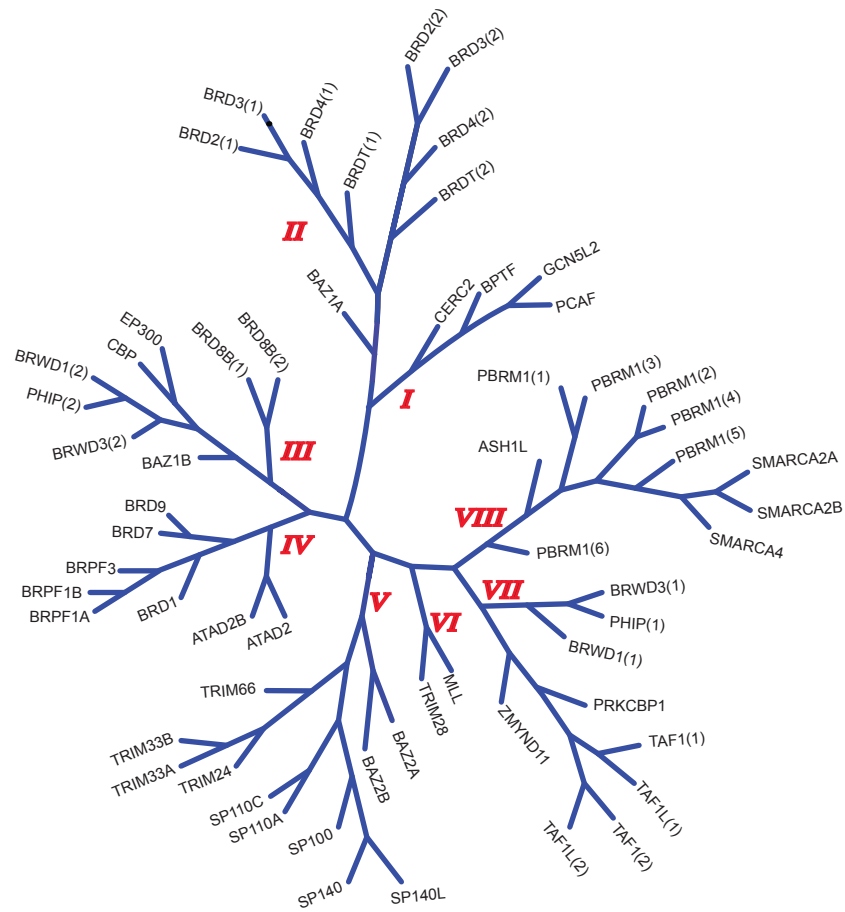

**Supplementary Figure 1. Phylogenetic tree of the human bromodomain family with sub-families named by roman numerals I-VIII. Subfamilies are classified based on sequence and structure. Figure adapted from *Cell* 2012 149, 214–231.**

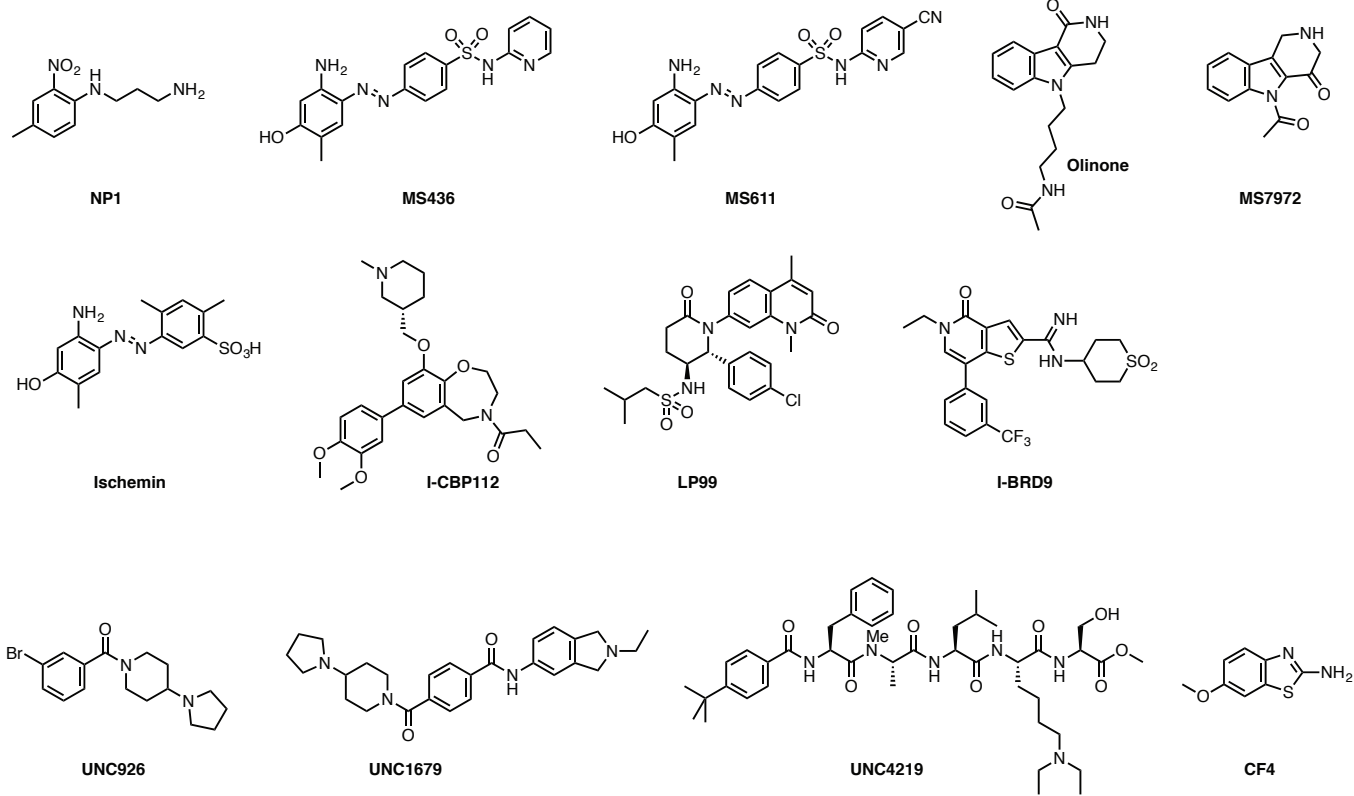

**Supplimentary Figure 2.** Chemical modulators of acetyl- and methyl-lysine binding domains
